# Supplementary material
Source: Springer Nature journal article supplement (https://www.springermedizin.de/resource/supplementary/12970_2009_120_MOESM1_ESM.pdf/9594432)
Supplement: MOESM1 [file 9594432]

15-day supplementation period

Day -4                      -1+0                      7+8                      14+15

1. Bench press throw 30% of 1-RM
2. Vertical jump power
3. Repetitions to exhaustion with 75% 1-RM in bench press and squat exercises
4. Visual Analog Scale for muscle soreness

1. Anthropometric Measures:  
Ht, Wt, Body composition
2. 1-RM bench press and Squat
